# Supplementary material for: In Vitro SARS-CoV-2 Infection of Microvascular Endothelial Cells: Effect on Pro-Inflammatory Cytokine and Chemokine Release
Source: MDPI journal article supplement (doi:10.3390/ijms23074063), 2022-04-06
Supplement: s1 [file s1]

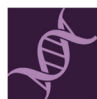

**Table S1.** SARS-CoV-2 N1 gene expression in HMEC-1 and VERO E6 supernatant and cellular RNA for each viral strain

|         |           | Supernatant (copies/mL) |                    |                    |                    |                    |                    | Cellular RNA (copies/ $\mu$ g) |                    |                       |                       |                    |                    |
|---------|-----------|-------------------------|--------------------|--------------------|--------------------|--------------------|--------------------|--------------------------------|--------------------|-----------------------|-----------------------|--------------------|--------------------|
|         |           | 4h                      | 6h                 | 24h                | 48h                | 72h                | 7 days             | 4h                             | 6h                 | 24h                   | 48h                   | 72h                | 7 days             |
| HMEC-1  | B.1       | 8.11 $\times 10^6$      | 1.09 $\times 10^7$ | 7.44 $\times 10^6$ | 6.23 $\times 10^6$ | 7.70 $\times 10^6$ | 7.45 $\times 10^6$ | 9.12 $\times 10^5$             | 9.37 $\times 10^5$ | 6.66 $\times 10^5$    | 2.92 $\times 10^5$    | 2.55 $\times 10^5$ | 1.66 $\times 10^5$ |
|         | B.1.617.2 | 3.03 $\times 10^7$      | 3.34 $\times 10^7$ | 4.51 $\times 10^7$ | -                  | -                  | -                  | 9.30 $\times 10^7$             | 1.31 $\times 10^8$ | 6.66 $\times 10^7$    | -                     | -                  | -                  |
|         | BA.1-like | 1.39 $\times 10^7$      | 2.26 $\times 10^7$ | 1.49 $\times 10^7$ | -                  | -                  | -                  | 7.05 $\times 10^5$             | 5.73 $\times 10^5$ | 3.08 $\times 10^5$    | -                     | -                  | -                  |
| VERO E6 | B.1       | 1.33 $\times 10^5$      | 1.16 $\times 10^5$ | 1.15 $\times 10^9$ | 6.03 $\times 10^9$ | 9.80 $\times 10^9$ | 2.91 $\times 10^9$ | 3.52 $\times 10^5$             | 5.01 $\times 10^6$ | 1.09 $\times 10^{11}$ | 1.85 $\times 10^{10}$ | 4.74 $\times 10^9$ | 2.54 $\times 10^9$ |
|         | B.1.617.2 | 2.21 $\times 10^6$      | 1.45 $\times 10^6$ | 3.08 $\times 10^8$ | -                  | -                  | -                  | 5.44 $\times 10^7$             | 7.62 $\times 10^7$ | 3.97 $\times 10^{10}$ | -                     | -                  | -                  |
|         | BA.1-like | 4.67 $\times 10^5$      | 7.04 $\times 10^5$ | 1.34 $\times 10^7$ | -                  | -                  | -                  | 5.64 $\times 10^5$             | 1.51 $\times 10^7$ | 1.22 $\times 10^9$    | -                     | -                  | -                  |

**Table S2.** SARS-CoV-2 N1 gene gRNA and sgRNA Ct values and relative  $\Delta$ Ct values for each viral strain

|         |           | gRNA  |       |       |       |       |        | sgRNA |       |       |       |       |        | $\Delta$ Ct (sgRNA-gRNA) |      |      |      |      |        |
|---------|-----------|-------|-------|-------|-------|-------|--------|-------|-------|-------|-------|-------|--------|--------------------------|------|------|------|------|--------|
|         |           | 4h    | 6h    | 24h   | 48h   | 72h   | 7 days | 4h    | 6h    | 24h   | 48h   | 72h   | 7 days | 4h                       | 6h   | 24h  | 48h  | 72h  | 7 days |
| HMEC-1  | B.1       | 23.68 | 23.94 | 23.86 | 24.71 | 24.92 | 25.51  | 27.40 | 28.10 | 28.26 | 29.60 | 29.00 | 30.62  | 3.72                     | 4.17 | 4.40 | 4.88 | 4.09 | 5.11   |
|         | B.1.617.2 | 18.50 | 16.96 | 17.96 | -     | -     | -      | 20.54 | 19.35 | 20.06 | -     | -     | -      | 2.49                     | 2.39 | 2.10 | -    | -    | -      |
|         | BA.1-like | 24.21 | 24.70 | 24.41 | -     | -     | -      | 27.55 | 27.88 | 25.62 | -     | -     | -      | 3.34                     | 3.18 | 1.20 | -    | -    | -      |
| VERO E6 | B.1       | -     | -     | 6.78  | 9.42  | 10.63 | 10.73  | -     | -     | 9.11  | 12.66 | 13.08 | 12.94  | -                        | -    | 2.34 | 3.24 | 2.45 | 2.21   |
